# Supplementary material
Source: Springer Nature journal article supplement (https://www.springermedizin.de/resource/supplementary/12936_2012_2184_MOESM3_ESM.pdf/9542478)

## Bhutan

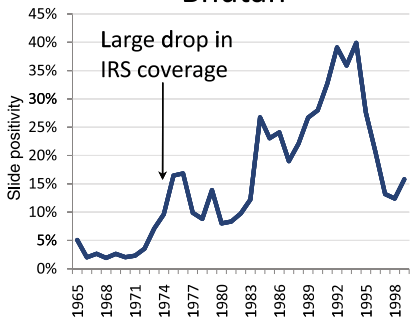

## India

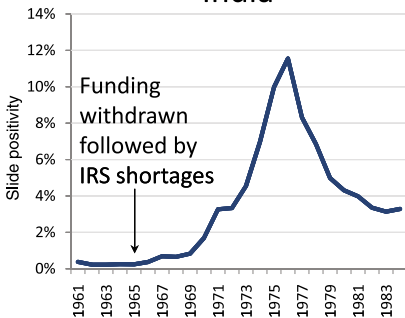

## Indonesia (Java)

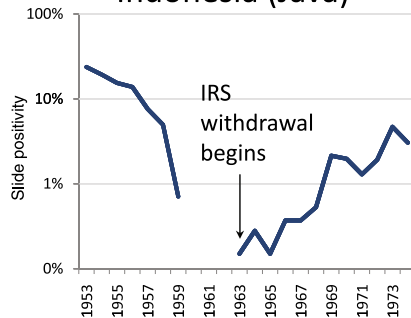

## Nepal

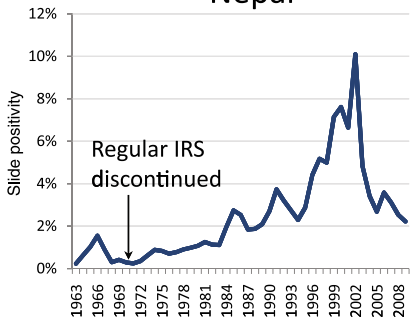

## Pakistan

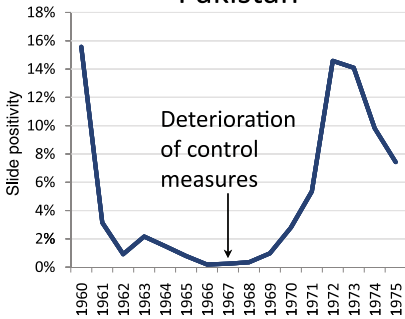

## Solomon Islands

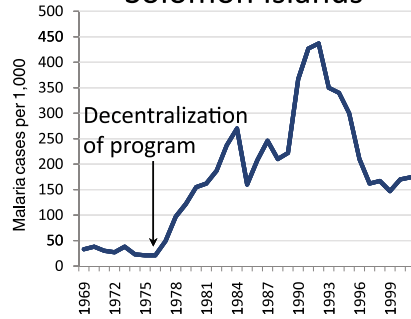

## Sri Lanka

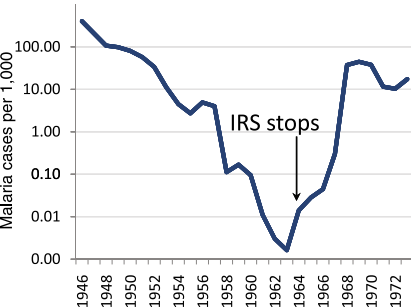

## Thailand

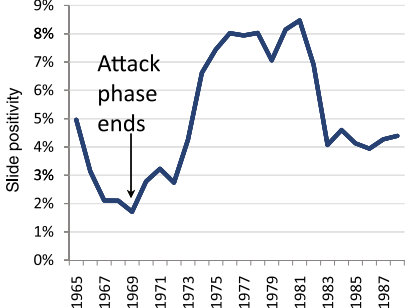

## Turkey

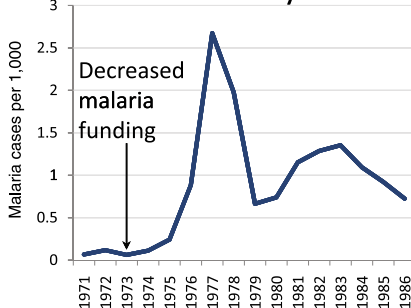

Supplement: MOESM3 [file 9542478]
